# Supplementary material
Source: PubMed Central journal article supplement (PMC3338272)
Supplement: supp_111.137869_137869SI.pdf [file supp_111.137869_137869SI.pdf]

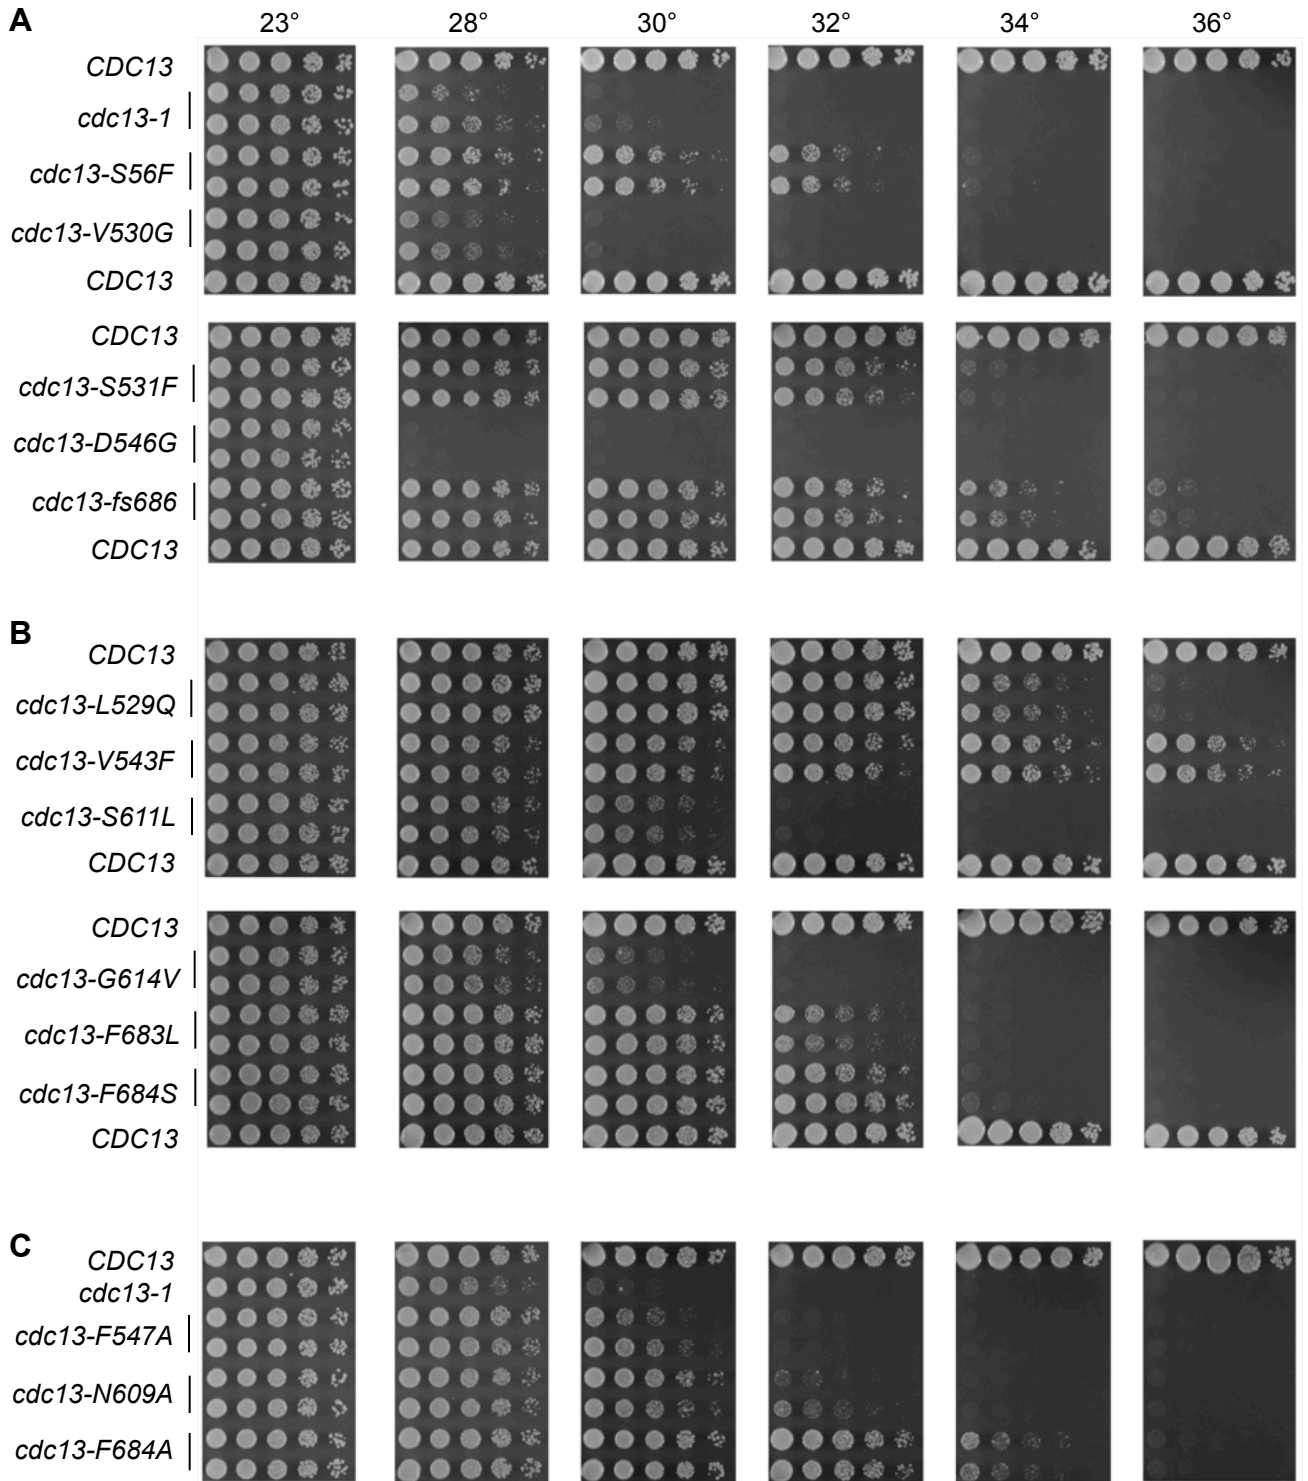

**Figure S1** Identification of new *cdc13-ts* mutations, part I. Mutant alleles recovered from (A) forward mutagenesis of the full length *CDC13* gene, (B) forward mutagenesis directed at the DBD of *CDC13* or (C) reverse mutagenesis of the DBD of *CDC13* were transformed into a *cdc13-Δ/pCEN CDC13 URA3* shuffle strain and subsequently streaked on 5-FOA media at 23°, to recover isolates which had lost the wild type *CDC13* plasmid. The resulting strains were grown overnight in culture and viability was assessed by plating serial dilutions on pre-warmed rich media plates and photographing after 2.5 days (for ≥ 28° incubations) or 4 days (for 23° and 25°).

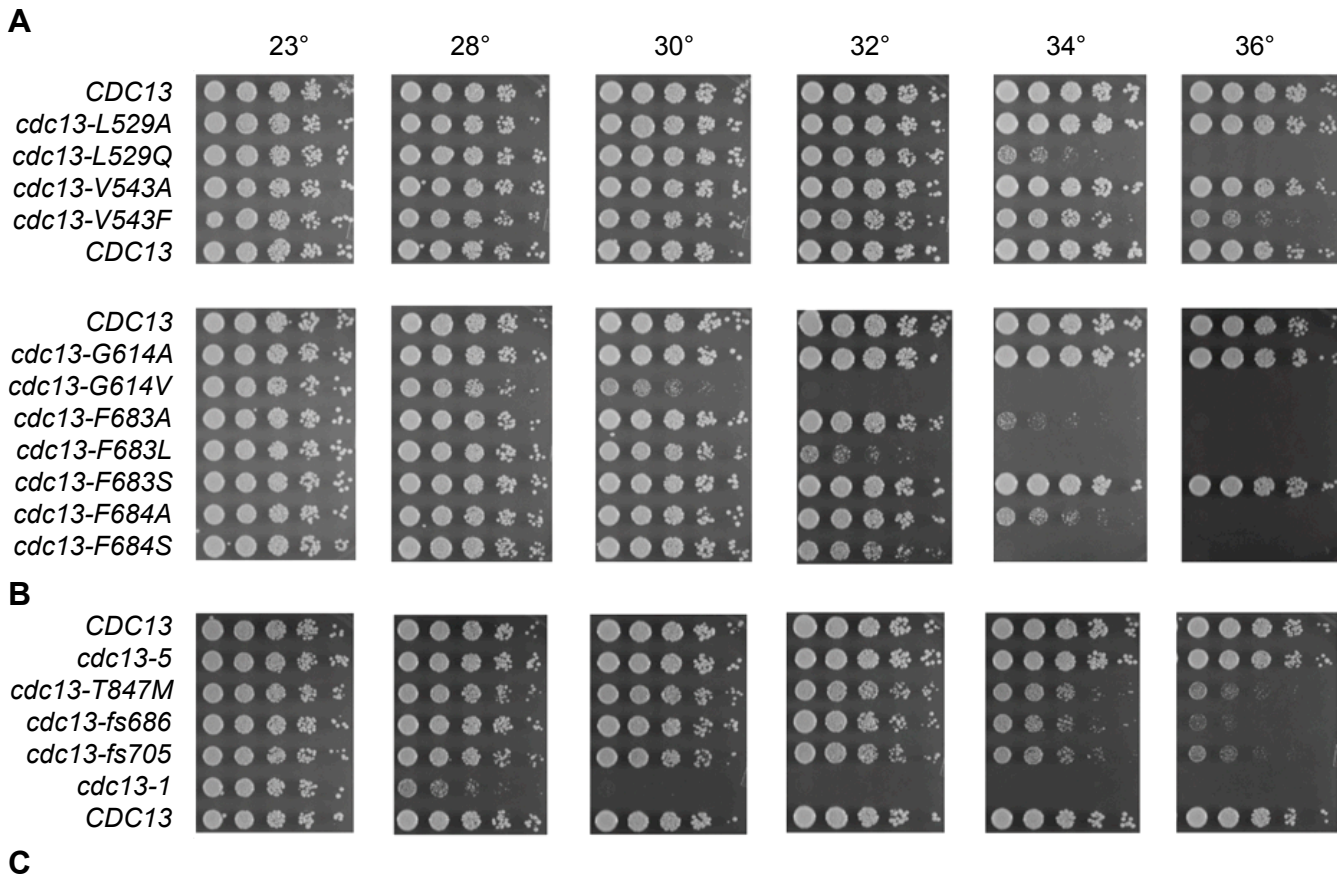

| Allele     | Mutations present<br>(cluster 1, cluster 2, cluster 3) |
|------------|--------------------------------------------------------|
| isolate 22 | <b>V543F</b>                                           |
| isolate 23 | N609D                                                  |
| isolate 26 | N609D, Y626F                                           |
| isolate 19 | L599P, S650P                                           |
| isolate 16 | <b>M525T</b> , I633V                                   |
| isolate 30 | T507A, <b>L529Q</b>                                    |
| isolate 21 | <b>S533L</b> , <b>V616A</b>                            |
| isolate 15 | M463I, <b>S611L</b>                                    |
| isolate 31 | P506S, <b>G614V</b>                                    |
| isolate 28 | <b>K618E</b> , <b>F683S</b>                            |
| isolate 20 | N631D, <b>F684S</b>                                    |
| isolate 17 | <b>D535G</b> , P651L, <b>F683L</b>                     |
| isolate 24 | V481E, A489T, L562Q                                    |
| isolate 25 | T496S, E519V, I578T                                    |
| isolate 27 | F575L, N627S, Y680C, <b>I686V</b>                      |
| isolate 29 | M498V, <b>F544L</b> , T586M, K629E                     |
| isolate 18 | <b>S531T</b> , I563V, E608V, K629E, L693P              |
| isolate 14 | N455D, T473A, D492G, I552T, F574S                      |

**Figure S2** Identification of new *cdc13-ts* mutations, Part II. (A) Additional mutant alleles, as discussed in the text, were analyzed as described in Figure S1. (B) Missense mutations identified in a panel of *cdc13-ts* alleles, following mutagenesis of the DNA binding domain with error-prone PCR, remissense; clusters of residues discussed in the text are indicated.

**A**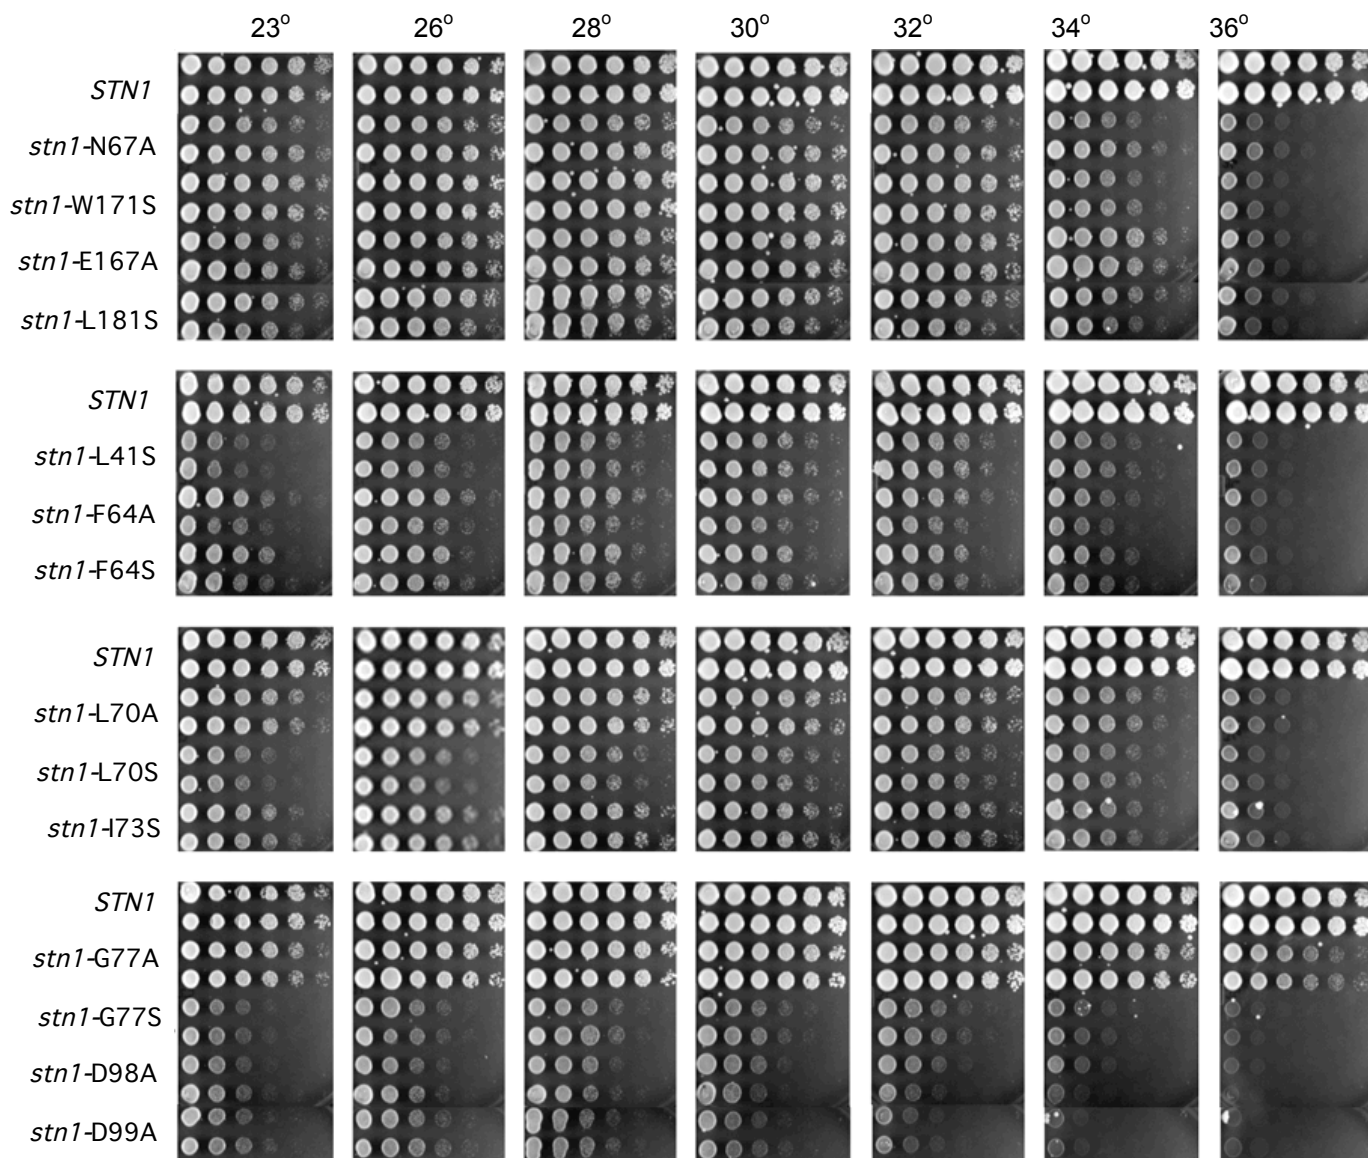**B**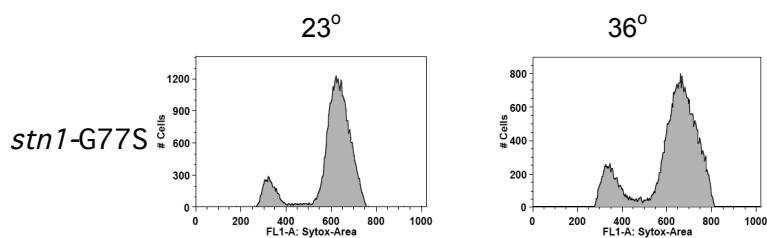

**Figure S3** Viability assays of *stn1*<sup>-</sup> missense mutations. (A) Plasmids carrying the indicated *Stn1* alleles were transformed into a *stn1*<sup>-</sup> $\Delta$ /p*CEN STN1 URA3* shuffle strain and subsequently streaked on 5-FOA media at 23°, to recover isolates which had lost the wild type *STN1* plasmid. The resulting strains were grown overnight in culture and viability was assessed by plating serial dilutions of two isolates for each genotype on pre-warmed rich media plates and photographing after 2.5 days (for  $\geq 28^\circ$  incubations) or 4 days (for 23° and 25°). (B) Flow cytometry profile of log-phase cultures of a *stn1*<sup>-</sup> $\Delta$ /p *stn1-G77S* strain grown at 23° and 36° for 3.5h.

**A**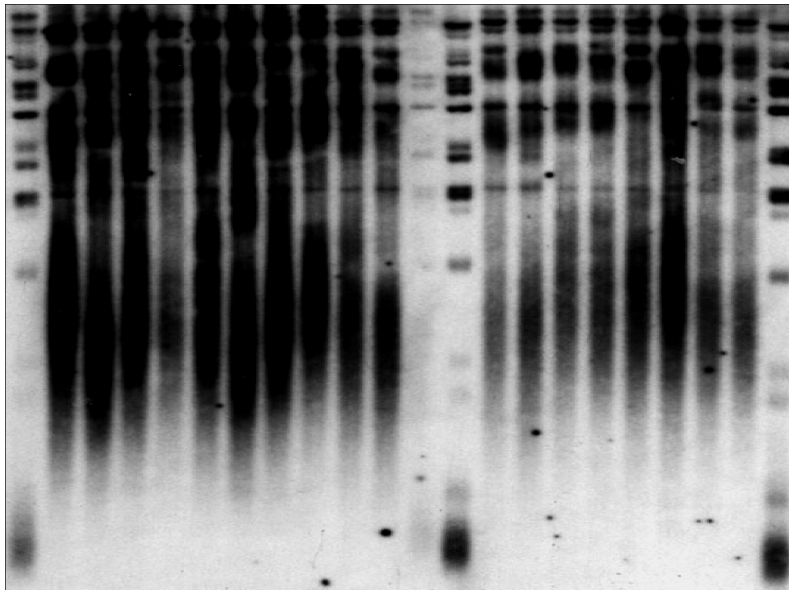**B**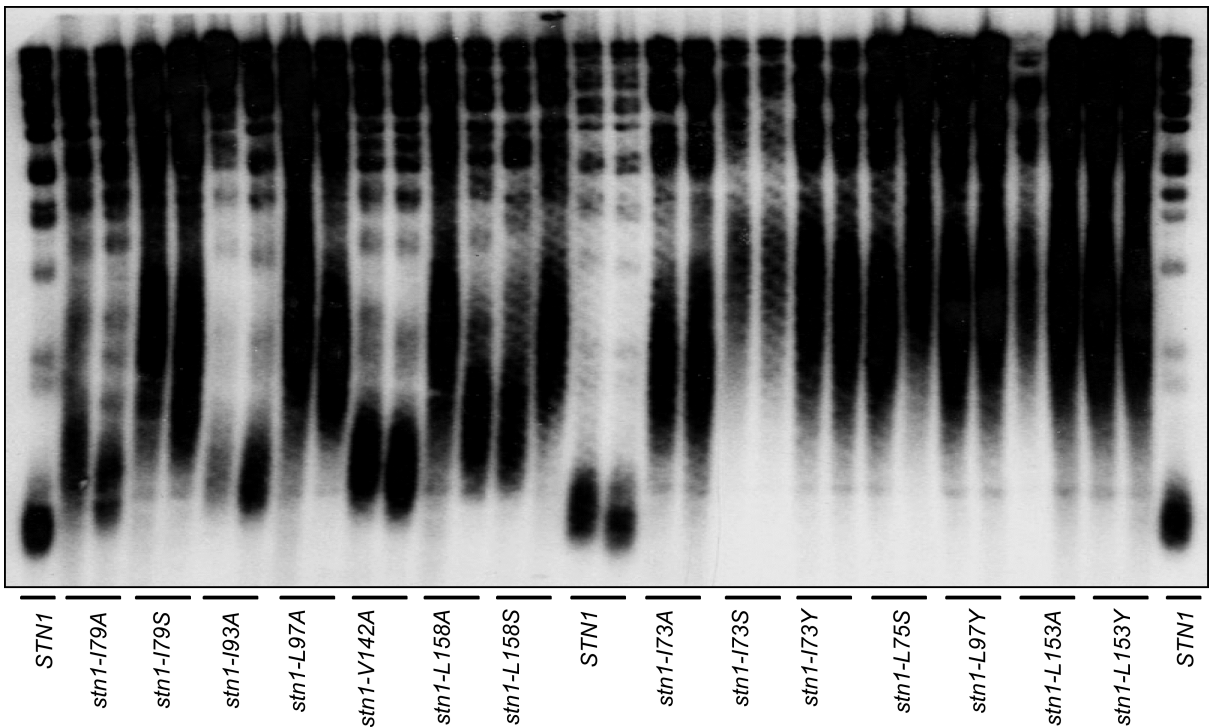

**Figure S4** Telomere length of strains expressing *stn1*<sup>-</sup> missense mutations in residues selected for reverse mutagenesis based on either (A) Evolutionary Trace or (B) position of the side-chain relative to the interior of the  $\beta$ -barrel of the essential N-terminal OB-fold domain of Stn1; *stn1*- $\Delta$  strains with *CEN* plasmids expressing the indicated mutations were grown at 23° prior to preparing genomic DNA for telomere length analysis.

|                         | Viable ?                    | Telomere length                          | 23°                    | 36°                    |
|-------------------------|-----------------------------|------------------------------------------|------------------------|------------------------|
| I73A<br>I73S<br>I73Y    | Neatly inviable             | Very long<br>Extremely long<br>Very long | +<br>+/-<br>+          | +/-<br>—<br>+/- to (+) |
| L75A<br>L75S<br>L75Y    | inviable                    | Med long<br>Very long<br>n/a             | +<br>(+) to +          | (+) to +<br>+/- to (+) |
| I79A<br>I79S<br>I79Y    | inviable                    | Med long<br>Very long<br>n/a             | ++<br>+ to ++          | +<br>(+)               |
| I93A<br>I93S<br>I93Y    |                             | Med long<br>Very long<br>Slightly long   | ++<br>+<br>++          | +<br>+/- to (+)<br>+   |
| L97A<br>L97S<br>L97Y    | inviable                    | Very long<br>n/a<br>Very long            | (+)<br><br>(+) to +    | +/-<br><br>+/-         |
| L106A<br>L106S<br>L106Y |                             | Wild type<br>Wild type<br>Wild type      | ++<br>++<br>++         | ++<br>++<br>++         |
| L140A<br>L140S<br>L140Y |                             | Wild type<br>Wild type<br>Wild type      | ++<br>++<br>++         | ++<br>++<br>++         |
| V142A<br>V142S<br>V142Y | Neatly inviable<br>inviable | Slightly long<br>n.t.<br>n/a             | + to ++<br>+/-         | +<br>—                 |
| L153A<br>L153S<br>L153Y | inviable                    | Very long<br>n/a<br>Very long            | (+)<br><br>(+)         | +/-<br><br>+/-         |
| V155A<br>V155S<br>V155Y | Neatly inviable<br>inviable | Very long<br>n.t.<br>n/a                 | +<br>+/-               | (+)<br>—               |
| L158A<br>L158S<br>L158Y |                             | Very long<br>Very long<br>n.t.           | +<br>+<br>(+)          | +<br>+<br>+/-          |
| G77A<br>G77S<br>G77Y    | Neatly inviable             | Very long<br>n.t.<br>n.t.                | (+) to +<br>(+)<br>+/- | +/- to +<br>+/-<br>—   |
| G137A<br>G137S<br>G137Y | +<br>+<br>inviable          | Very long<br>Long<br>n/a                 | +(+)<br>++             | (+)<br>+               |

**Figure S5** Summary of viability and telomere length of a panel of *stn1*<sup>-</sup> missense mutations introduced into 11 hydrophobic residues with side-chains located in the interior of the  $\beta$ -barrel of the essential N-terminal OB-fold domain of Stn1. Telomere length of selected mutant isolates is shown in Figure S4. The results for mutagenesis of two highly conserved glycine residues are also included.

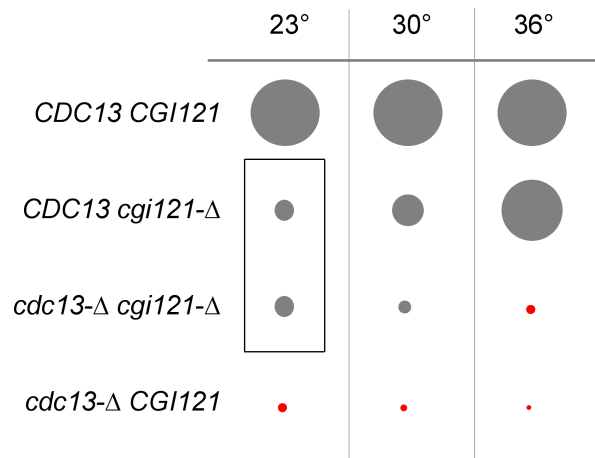

**Figure S6** Schematic of relative colony size following dissection of a *CDC13/cdc13-Δ RAD24/rad24-Δ CGI121/cgi121-Δ* diploid; colony size is roughly to scale, with red dots indicating colonies that can only be visualized with magnification. All indicated genotypes are also *rad24-Δ*. Data for representative colonies indicated by the box are shown in Figure 8C.
