# Supplementary material
Source: PubMed Central journal article supplement (PMC3338272)
Supplement: supp_111.137869_FigureS1.pdf [file supp_111.137869_FigureS1.pdf]

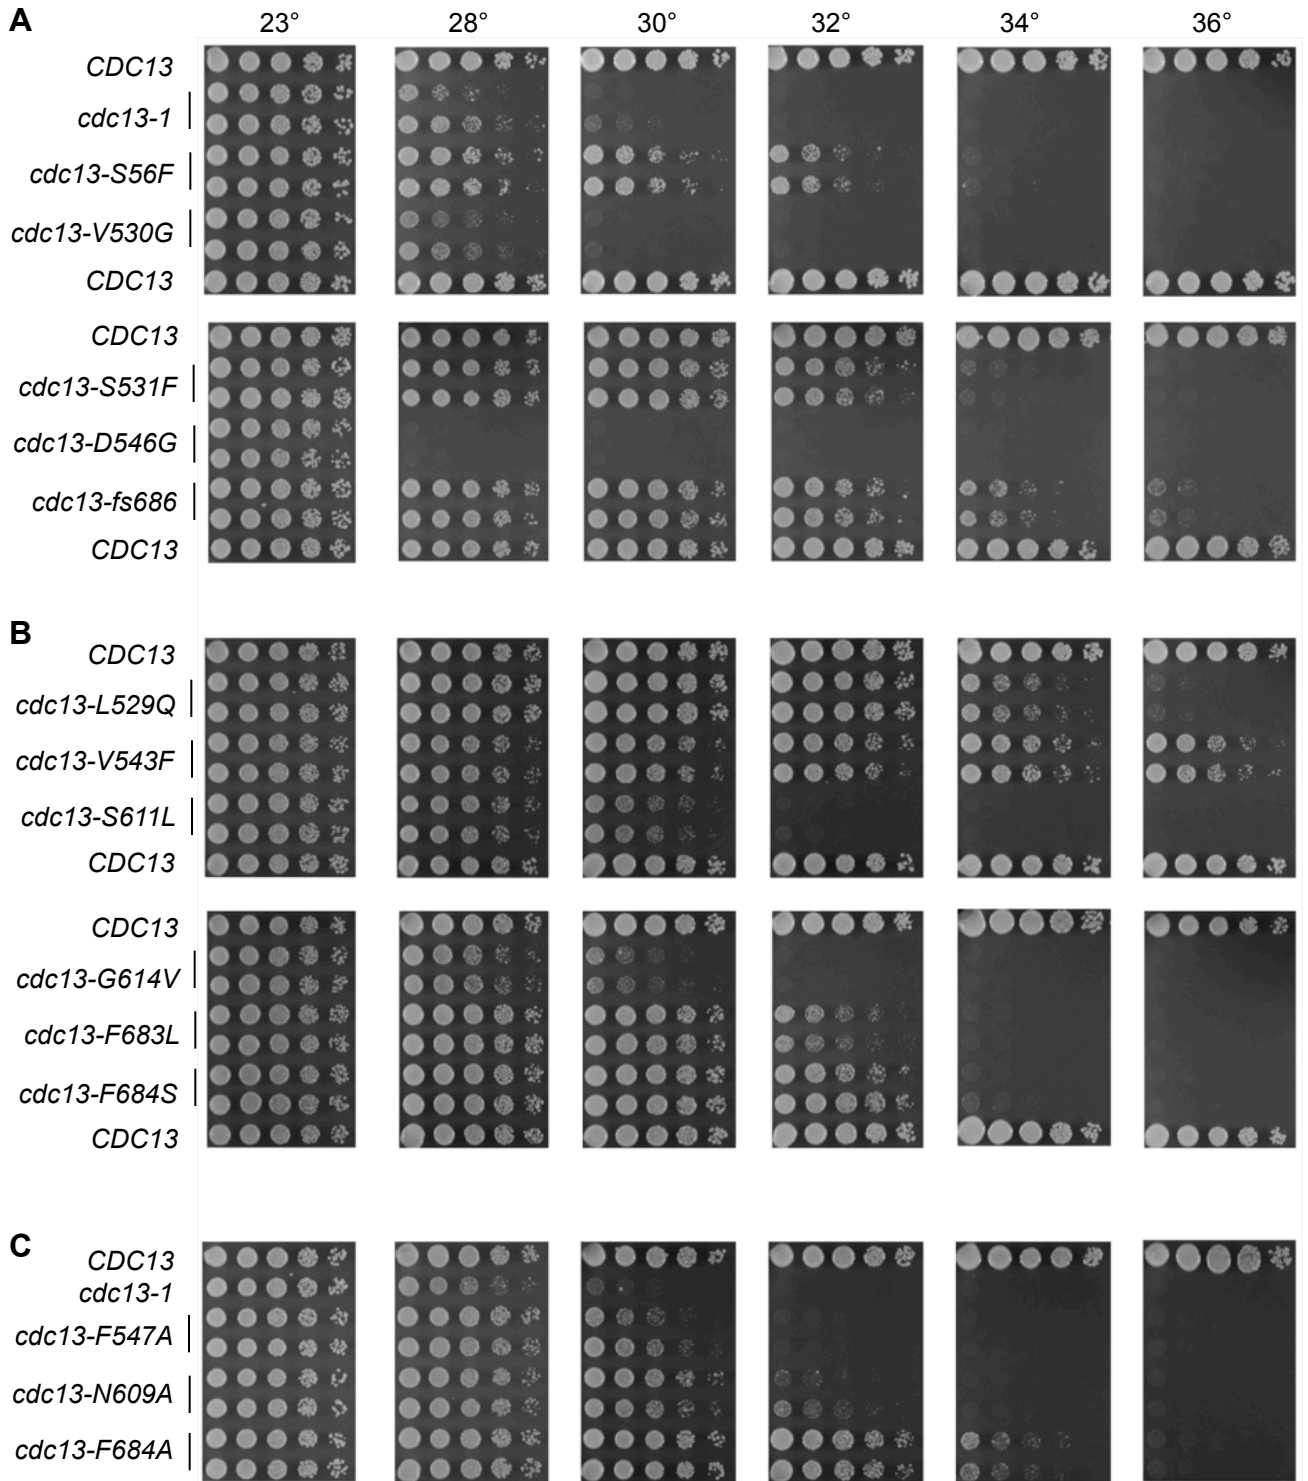

**Figure S1** Identification of new *cdc13-ts* mutations, part I. Mutant alleles recovered from (A) forward mutagenesis of the full length *CDC13* gene, (B) forward mutagenesis directed at the DBD of *CDC13* or (C) reverse mutagenesis of the DBD of *CDC13* were transformed into a *cdc13-Δ/pCEN CDC13 URA3* shuffle strain and subsequently streaked on 5-FOA media at 23°, to recover isolates which had lost the wild type *CDC13* plasmid. The resulting strains were grown overnight in culture and viability was assessed by plating serial dilutions on pre-warmed rich media plates and photographing after 2.5 days (for ≥ 28° incubations) or 4 days (for 23° and 25°).
