# Supplementary material
Source: PubMed Central journal article supplement (PMC3338272)
Supplement: supp_111.137869_FigureS2.pdf [file supp_111.137869_FigureS2.pdf]

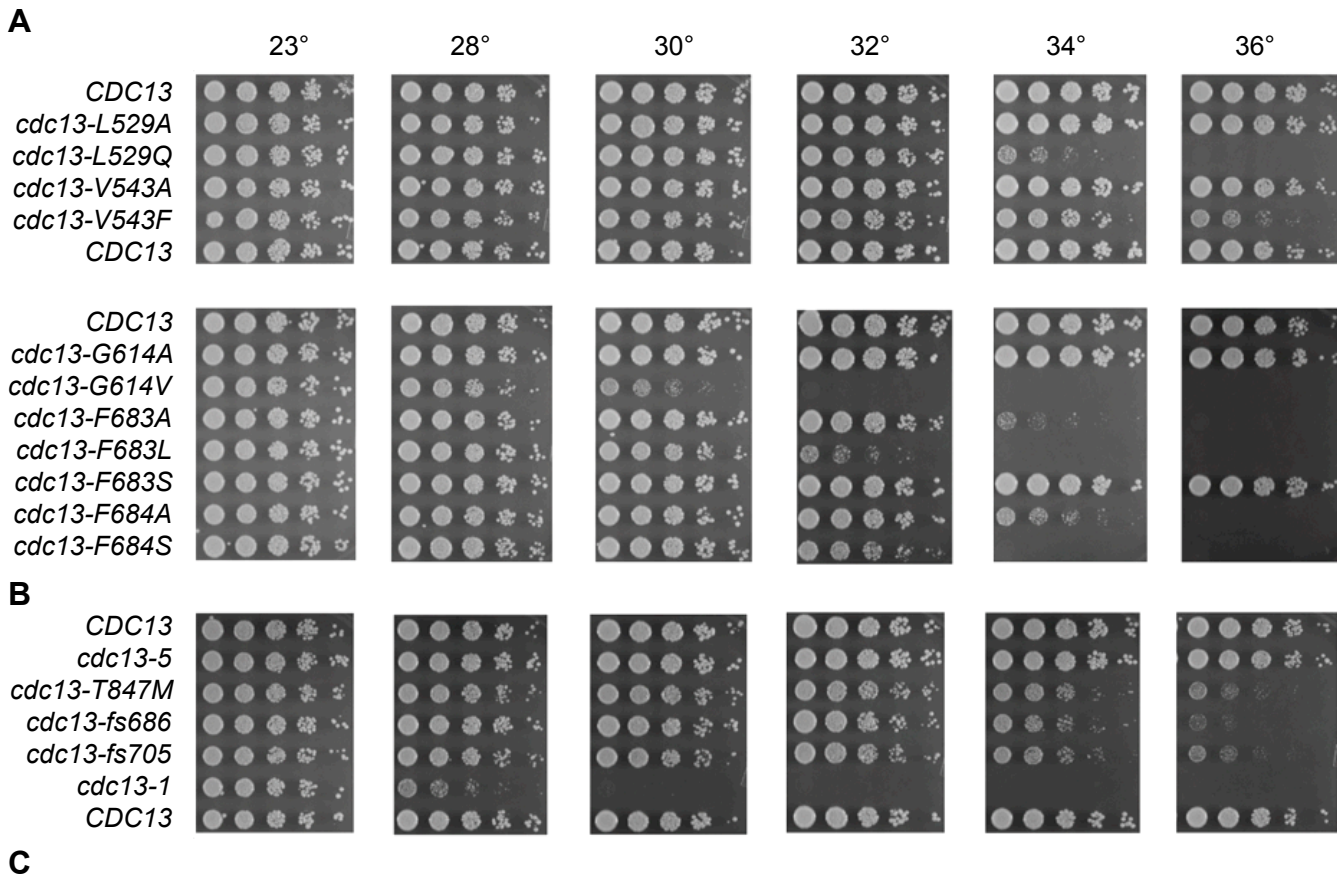

| Allele     | Mutations present<br>(cluster 1, cluster 2, cluster 3) |
|------------|--------------------------------------------------------|
| isolate 22 | <b>V543F</b>                                           |
| isolate 23 | N609D                                                  |
| isolate 26 | N609D, Y626F                                           |
| isolate 19 | L599P, S650P                                           |
| isolate 16 | <b>M525T</b> , I633V                                   |
| isolate 30 | T507A, <b>L529Q</b>                                    |
| isolate 21 | <b>S533L</b> , <b>V616A</b>                            |
| isolate 15 | M463I, <b>S611L</b>                                    |
| isolate 31 | P506S, <b>G614V</b>                                    |
| isolate 28 | <b>K618E</b> , <b>F683S</b>                            |
| isolate 20 | N631D, <b>F684S</b>                                    |
| isolate 17 | <b>D535G</b> , P651L, <b>F683L</b>                     |
| isolate 24 | V481E, A489T, L562Q                                    |
| isolate 25 | T496S, E519V, I578T                                    |
| isolate 27 | F575L, N627S, Y680C, <b>I686V</b>                      |
| isolate 29 | M498V, <b>F544L</b> , T586M, K629E                     |
| isolate 18 | <b>S531T</b> , I563V, E608V, K629E, L693P              |
| isolate 14 | N455D, T473A, D492G, I552T, F574S                      |

**Figure S2** Identification of new *cdc13-ts* mutations, Part II. (A) Additional mutant alleles, as discussed in the text, were analyzed as described in Figure S1. (B) Missense mutations identified in a panel of *cdc13-ts* alleles, following mutagenesis of the DNA binding domain with error-prone PCR, remissense; clusters of residues discussed in the text are indicated.
