# Supplementary material
Source: PubMed Central journal article supplement (PMC3338272)
Supplement: supp_111.137869_FigureS3.pdf [file supp_111.137869_FigureS3.pdf]

**A**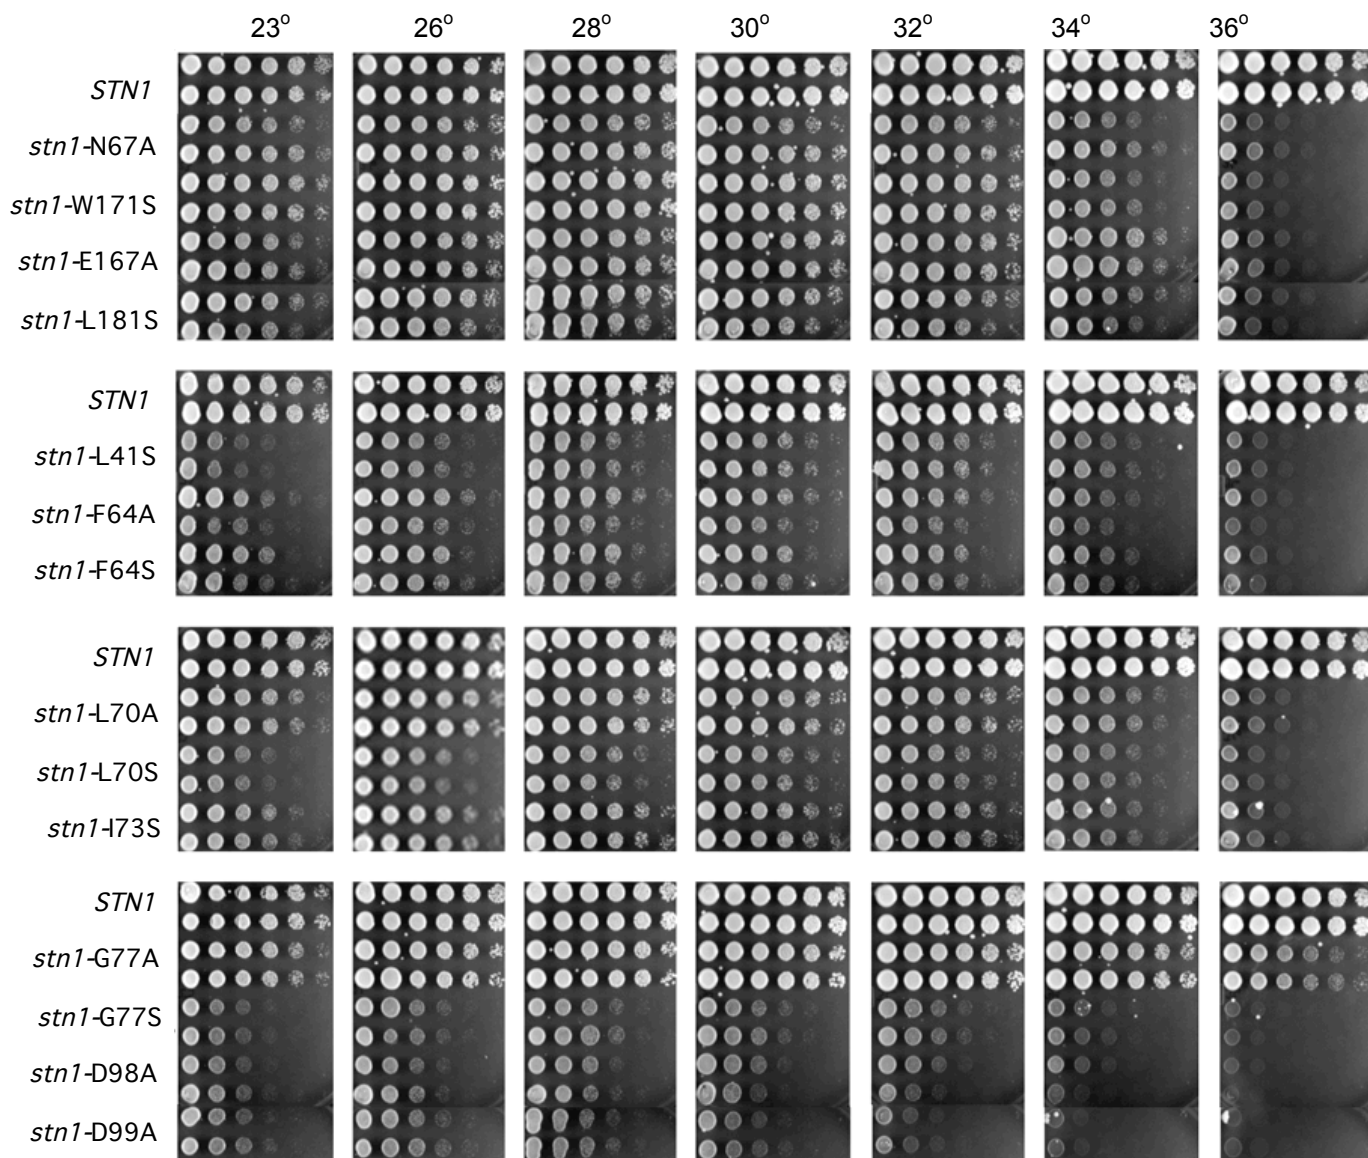**B**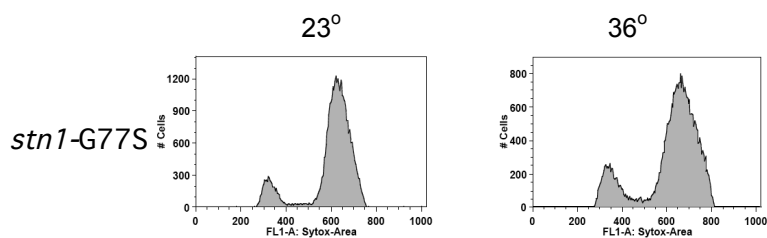

**Figure S3** Viability assays of *stn1*<sup>-</sup> missense mutations. (A) Plasmids carrying the indicated *Stn1* alleles were transformed into a *stn1*<sup>-</sup> $\Delta$ /p*CEN STN1 URA3* shuffle strain and subsequently streaked on 5-FOA media at 23°, to recover isolates which had lost the wild type *STN1* plasmid. The resulting strains were grown overnight in culture and viability was assessed by plating serial dilutions of two isolates for each genotype on pre-warmed rich media plates and photographing after 2.5 days (for  $\geq 28^\circ$  incubations) or 4 days (for 23° and 25°). (B) Flow cytometry profile of log-phase cultures of a *stn1*<sup>-</sup> $\Delta$ /p *stn1-G77S* strain grown at 23° and 36° for 3.5h.
