# Supplementary material
Source: PubMed Central journal article supplement (PMC3338272)
Supplement: supp_111.137869_FigureS4.pdf [file supp_111.137869_FigureS4.pdf]

**A**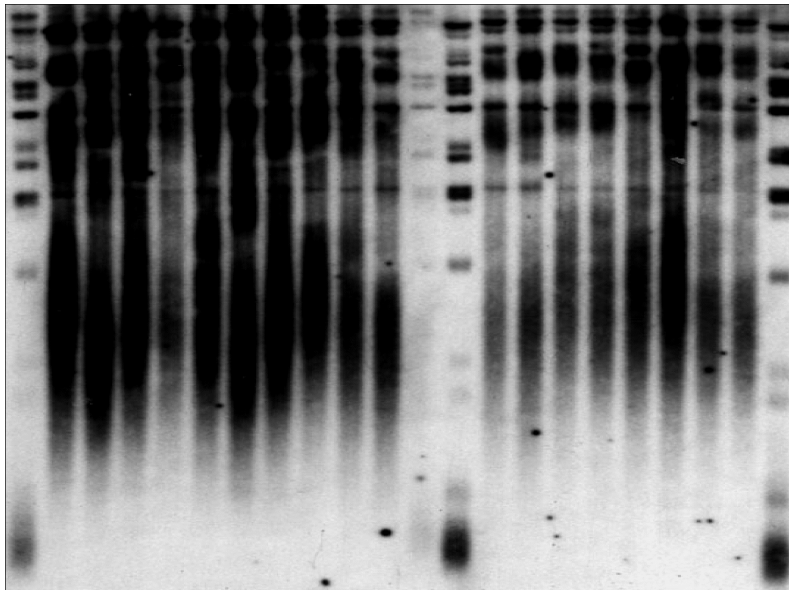**B**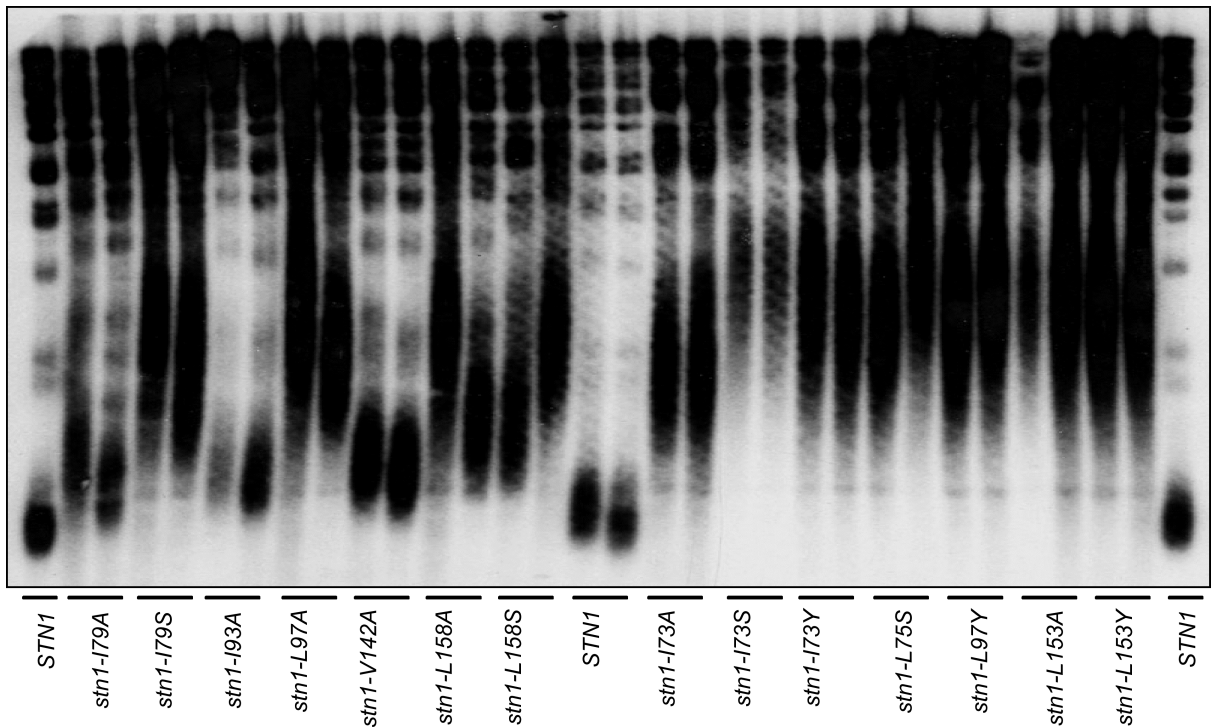

**Figure S4** Telomere length of strains expressing *stn1*<sup>-</sup> missense mutations in residues selected for reverse mutagenesis based on either (A) Evolutionary Trace or (B) position of the side-chain relative to the interior of the  $\beta$ -barrel of the essential N-terminal OB-fold domain of Stn1; *stn1* $\Delta$  strains with *CEN* plasmids expressing the indicated mutations were grown at 23° prior to preparing genomic DNA for telomere length analysis.
