# Supplementary material
Source: PubMed Central journal article supplement (PMC3338272)
Supplement: supp_111.137869_FigureS5.pdf [file supp_111.137869_FigureS5.pdf]

|                         | Viable?                     | Telomere length                          | 23°                    | 36°                    |
|-------------------------|-----------------------------|------------------------------------------|------------------------|------------------------|
| I73A<br>I73S<br>I73Y    | Neatly inviable             | Very long<br>Extremely long<br>Very long | +<br>+/-<br>+          | +/-<br>—<br>+/- to (+) |
| L75A<br>L75S<br>L75Y    | inviable                    | Med long<br>Very long<br>n/a             | +<br>(+) to +          | (+) to +<br>+/- to (+) |
| I79A<br>I79S<br>I79Y    | inviable                    | Med long<br>Very long<br>n/a             | ++<br>+ to ++          | +<br>(+)               |
| I93A<br>I93S<br>I93Y    |                             | Med long<br>Very long<br>Slightly long   | ++<br>+<br>++          | +<br>+/- to (+)<br>+   |
| L97A<br>L97S<br>L97Y    | inviable                    | Very long<br>n/a<br>Very long            | (+)<br><br>(+) to +    | +/-<br><br>+/-         |
| L106A<br>L106S<br>L106Y |                             | Wild type<br>Wild type<br>Wild type      | ++<br>++<br>++         | ++<br>++<br>++         |
| L140A<br>L140S<br>L140Y |                             | Wild type<br>Wild type<br>Wild type      | ++<br>++<br>++         | ++<br>++<br>++         |
| V142A<br>V142S<br>V142Y | Neatly inviable<br>inviable | Slightly long<br>n.t.<br>n/a             | + to ++<br>+/-         | +<br>—                 |
| L153A<br>L153S<br>L153Y | inviable                    | Very long<br>n/a<br>Very long            | (+)<br><br>(+)         | +/-<br><br>+/-         |
| V155A<br>V155S<br>V155Y | Neatly inviable<br>inviable | Very long<br>n.t.<br>n/a                 | +<br>+/-               | (+)<br>—               |
| L158A<br>L158S<br>L158Y |                             | Very long<br>Very long<br>n.t.           | +<br>+<br>(+)          | +<br>+<br>+/-          |
| G77A<br>G77S<br>G77Y    | Neatly inviable             | Very long<br>n.t.<br>n.t.                | (+) to +<br>(+)<br>+/- | +/- to +<br>+/-<br>—   |
| G137A<br>G137S<br>G137Y | +<br>+<br>inviable          | Very long<br>Long<br>n/a                 | +(+)<br>++             | (+)<br>+               |

**Figure S5** Summary of viability and telomere length of a panel of *stn1*<sup>-</sup> missense mutations introduced into 11 hydrophobic residues with side-chains located in the interior of the  $\beta$ -barrel of the essential N-terminal OB-fold domain of Stn1. Telomere length of selected mutant isolates is shown in Figure S4. The results for mutagenesis of two highly conserved glycine residues are also included.
