# Supplementary material
Source: PubMed Central journal article supplement (PMC3338272)
Supplement: supp_111.137869_FigureS6.pdf [file supp_111.137869_FigureS6.pdf]

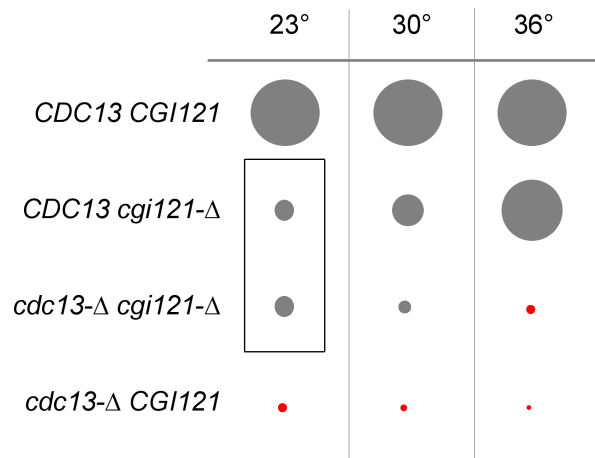

**Figure S6** Schematic of relative colony size following dissection of a *CDC13/cdc13-Δ RAD24/rad24-Δ CGI121/cgi121-Δ* diploid; colony size is roughly to scale, with red dots indicating colonies that can only be visualized with magnification. All indicated genotypes are also *rad24-Δ*. Data for representative colonies indicated by the box are shown in Figure 8C.
